# Supplementary material for: Spatial and temporal evolution of future atmospheric reactive nitrogen deposition in China under different climate change mitigation strategies
Source: Copernicus journal article supplement (doi:10.5194/acp-25-2147-2025), 2025-02-19
Supplement: Supplementary file 1 [file acp-25-2147-2025-supplement.pdf]

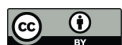

*Supplement of*

## **Spatial and temporal evolution of future atmospheric reactive nitrogen deposition in China under different climate change mitigation strategies**

**Mingrui Ma et al.**

*Correspondence to:* Yu Zhao (yuzhao@nju.edu.cn)

The copyright of individual parts of the supplement might differ from the article licence.

# Supplement

1

2

## 3 **Text**

$$4 \quad MB = \frac{1}{n} \sum_{i=1}^n (S_i - O_i) \quad (S1)$$

$$5 \quad ME = \frac{1}{n} \sum_{i=1}^n |S_i - O_i| \quad (S2)$$

6 where  $S$  and  $O$  are the monthly meteorological variables from model simulation and  
7 observation, respectively;  $i$  means the individual month.

8

## 9 **Table List**

10 Table S1 Major physical options for WRF v3.9.1.

11 Table S2 Spatial correlation ( $R$ ) between future emission changes and the resulting  
12 deposition changes under different future emission scenarios.

13 Table S3 Simulated outflow fluxes of OXN from WC to EC for Cases where  
14 emissions change to 2060s levels in all regions as well as Cases where emissions in  
15 WC are maintained at 2010s levels. Relative changes (%) are calculated by comparing  
16 Cases with 2060s emission levels in all regions to Cases with 2010s emission levels in  
17 WC, then dividing the difference by the 2010s emission levels in WC. The unit for  
18 outflow fluxes is  $\text{kg N s}^{-1}$ .

19 Table S4 Simulated outflow fluxes of OXN from EC for Cases where emissions are  
20 maintained at 2010s levels as well as Cases where emissions change to 2060s levels.  
21 Relative changes (%) are calculated by comparing Cases with 2060s emission levels  
22 to Cases with 2010s emission levels, then dividing the difference by the 2010s  
23 emission levels. The unit for outflow fluxes is  $\text{kg N s}^{-1}$ .

24

25 **Figure List**

26 **Figure S1** The model domain and defined key regions. The black box represents the  
27 WRF domain, and the green box represents the CMAQ domain. Western and Eastern  
28 China (WC and EC) are divided by 110°E. The red boxes represent the northern China  
29 (NC, 30–45°N, 110–125°E) and southern China (SC, 20–30°N, 110–125°E),  
30 respectively. The blue boxes represent the regions of Beijing-Tianjin-Hebei (BTH),  
31 Yangtze River Delta (YRD, 20–30°N, 110–125°E), and Pearl River Delta (PRD),  
32 respectively.

33 **Figure S2** Annual average emissions of NO<sub>x</sub>, NH<sub>3</sub>, PM<sub>2.5</sub>, NMVOC, and SO<sub>2</sub> for  
34 2010s and 2060s for emission scenarios of “Baseline”, “Current-goal”, and  
35 “Neutral-goal”.

36 **Figure S3** Annual Nr deposition flux (kg N ha<sup>-1</sup> yr<sup>-1</sup>), five-year standard deviation  
37 (SD, kg N ha<sup>-1</sup> yr<sup>-1</sup>) for 2010-2014 (red) and for 2060-2064 (blue) under the SSP2-4.5  
38 (Case 1) and SSP5-8.5 (Case 2) pathways.

39 **Figure S4** Spatial distribution of Nr deposition fluxes in 2060s under “Neutral-goal”  
40 scenario.

41 **Figure S5** Annual average changes in near-surface concentrations of NO<sub>2</sub> (a), O<sub>3</sub> (b),  
42 HNO<sub>3</sub> (c) and DDEP\_OXN (d) attributed to a 20% reduction of emissions in NC for  
43 2010s and 2060s under different emission scenarios.

44

45 **Table S1 Major physical options for WRF v3.9.1.**

| Physical Option                | Setup                                                       |
|--------------------------------|-------------------------------------------------------------|
| Cloud Microphysics             | Lin scheme <sup>a</sup>                                     |
| Long-wave Radiation            | RRTMG scheme <sup>b</sup>                                   |
| Short-wave Radiation           | Goddard scheme <sup>c</sup>                                 |
| Planetary Boundary Layer       | YSU scheme <sup>d</sup>                                     |
| Cumulus                        | G3 scheme <sup>e</sup>                                      |
| Land Surface                   | Noah-MP scheme <sup>f</sup>                                 |
| Urban Canopy                   | UCM scheme <sup>g</sup>                                     |
| Sea Surface Temperature Update | On                                                          |
| Analysis Nudging               | Temperature, water vapor mixing and wind (in and above PBL) |

46 <sup>a</sup>Lin scheme: A sophisticated microphysics scheme to predict different forms of water phase  
 47 substance developed by Lin et al. (1983). The scheme has considered ice, snow and graupel  
 48 processes, suitable for real-data high-resolution simulations.

49 <sup>b</sup>RRTMG scheme: A new version of Rapid Radiative Transfer Model (RRTM) scheme developed  
 50 by Iacono et al. (2008), which included the Monte Carlo Independent Column Approximation  
 51 (MCICA) method of random cloud overlap.

52 <sup>c</sup>Goddard scheme: Two-stream multi-band scheme with ozone from climatology and cloud effects  
 53 developed by Chou and Suarez (1994).

54 <sup>d</sup>YSU scheme: Yonsei University scheme developed by Hong et al. (2006), which explicit  
 55 entrainment layer and parabolic K profile in unstable mixed layer based on the Non-local-K  
 56 scheme.

57 <sup>e</sup>G3 scheme: Grell 3D scheme, which is an improved version of the Grell-Devenyi (GD) ensemble  
 58 scheme (Goodarzi et al. 2019). It could be used on high resolution when considering subsidence  
 59 spreading.

60 <sup>f</sup>Noah-MP scheme: Noah multi-physics Land Surface Model scheme. It contains a separate  
 61 vegetation canopy defined by a canopy top and bottom with leaf physical and radiometric  
 62 properties used in a two-stream canopy radiation transfer scheme that includes shading. Horizontal  
 63 and vertical vegetation density can be prescribed or predicted using prognostic photosynthesis and  
 64 dynamic vegetation models that allocate carbon to vegetation (leaf, stem, wood and root) and soil  
 65 carbon pools (fast and slow) (Niu et al. 2011).

66 <sup>g</sup>UCM scheme: Urban Canopy Models scheme. It considers 3-category surface effects for roofs,  
 67 walls, and streets when calculate the exchange of energy and kinetic energy between the surface  
 68 and the atmosphere (Chen et al. 2011).

69 **Table S2** Spatial correlation (R) between the emission change and the deposition  
70 change from 2010s to 2060s under different emission scenarios.

|     | “Baseline” | “Current-goal” | “Neutral-goal” |
|-----|------------|----------------|----------------|
| OXN | 0.24       | 0.32           | 0.35           |
| RDN | 0.67       | 0.71           | 0.72           |

71  
72

73 **Table S3** Simulated outflow fluxes of OXN from WC to EC for Cases where  
 74 emissions change to 2060s levels in all regions as well as Cases where emissions in  
 75 WC are maintained at 2010s levels. Relative changes (%) are calculated by comparing  
 76 Cases with 2060s emission levels in all regions to Cases with 2010s emission levels in  
 77 WC, then dividing the difference by the 2010s emission levels in WC. The unit for  
 78 outflow fluxes is kg N s<sup>-1</sup>.

|                | Emissions in WC are<br>maintained at 2010s levels | Emissions change to 2060s<br>levels in all regions | Relative<br>change |
|----------------|---------------------------------------------------|----------------------------------------------------|--------------------|
| “Baseline”     | 175.49 (Case 7)                                   | 193.06 (Case 2)                                    | 10%                |
| “Current-goal” | 74.62 (Case 6)                                    | 54.53 (Case 1)                                     | -27%               |
| “Neutral-goal” | 49.31 (Case 8)                                    | 12.19 (Case 5)                                     | -75%               |

79  
80

81 **Table S4** Simulated outflow fluxes of OXN from EC for Cases where emissions are  
 82 maintained at 2010s levels as well as Cases where emissions change to 2060s levels.  
 83 Relative changes (%) are calculated by comparing Cases with 2060s emission levels  
 84 to Cases with 2010s emission levels, then dividing the difference by the 2010s  
 85 emission levels. The unit for outflow fluxes is kg N s<sup>-1</sup>.

|                | Emissions are at<br>2010s levels | Emissions are at<br>2060s levels | Relative<br>change |
|----------------|----------------------------------|----------------------------------|--------------------|
| “Baseline”     | 178.82 (Case4)                   | 213.38 (Case2)                   | 19%                |
| “Current-goal” | 193.70 (Case3)                   | 99.25 (Case1)                    | -49%               |
| “Neutral-goal” | 193.70 (Case3)                   | 20.84 (Case5)                    | -89%               |

86  
87

88 **Figure S1**

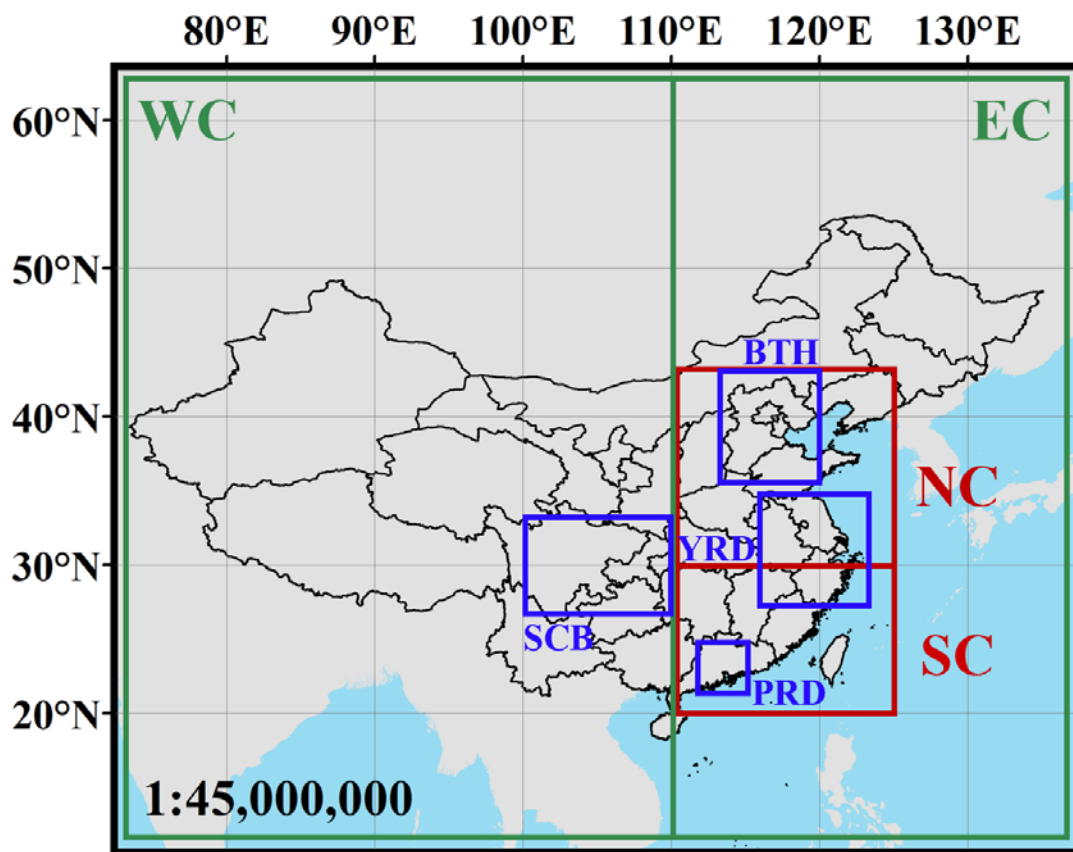

89

90



91 **Figure S2**

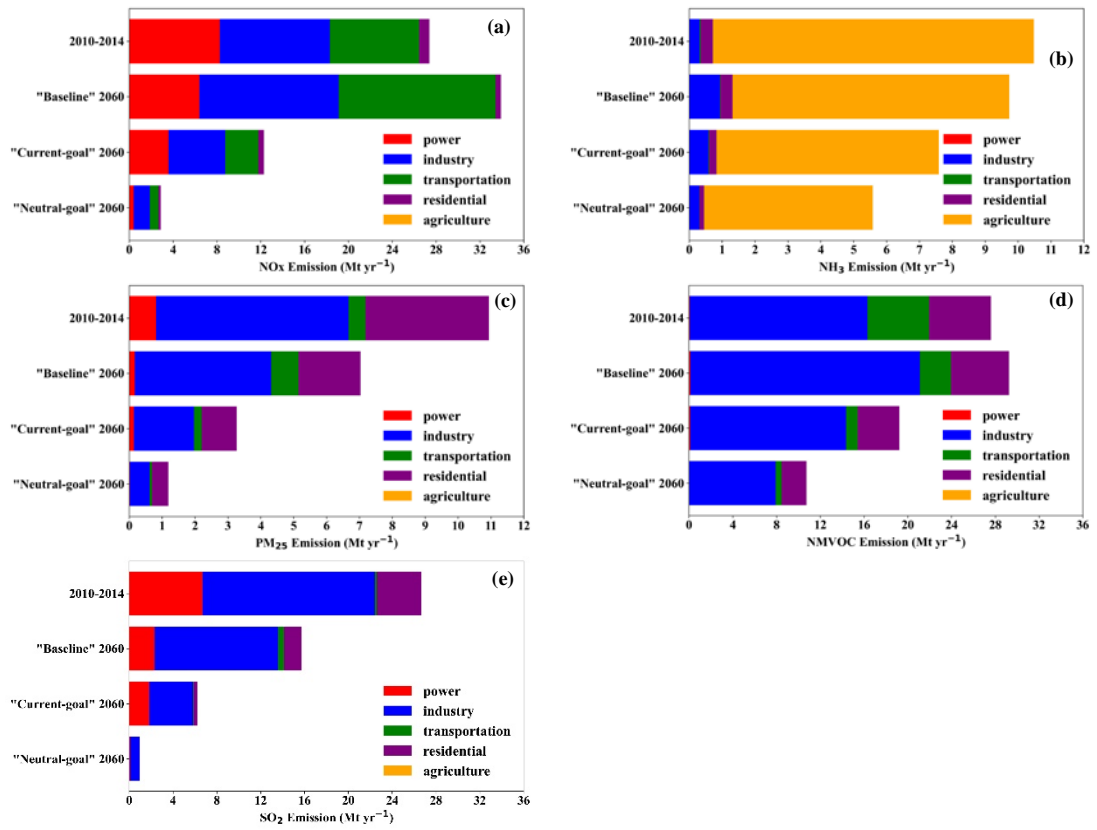

92

93

94 **Figure S3**

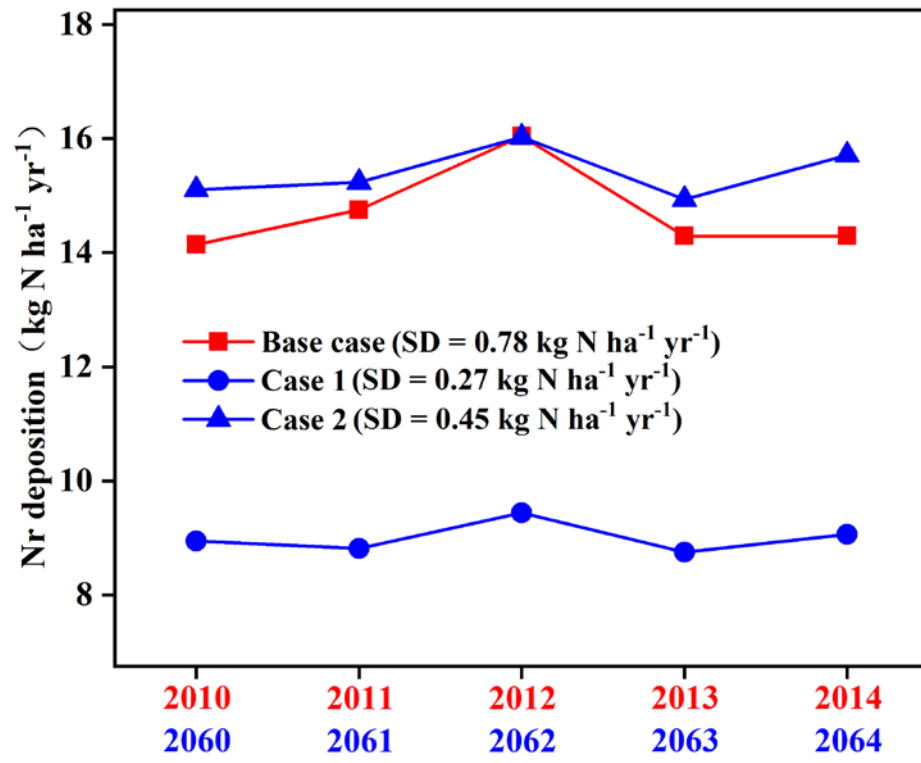

95

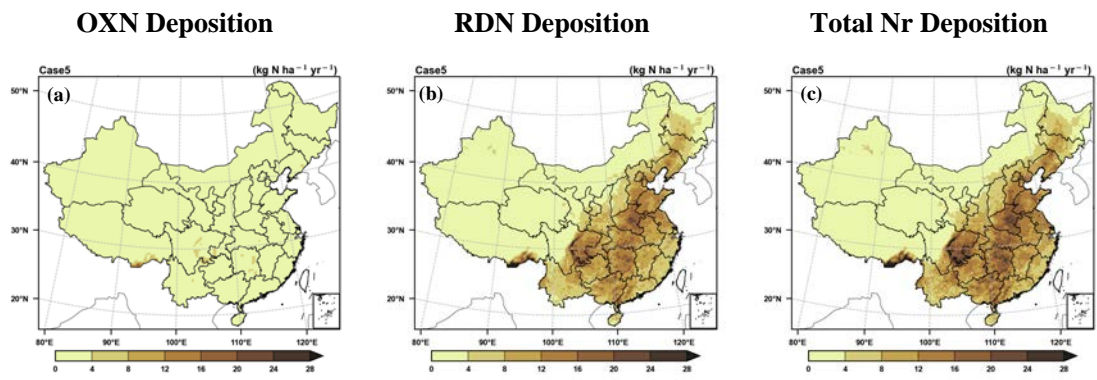

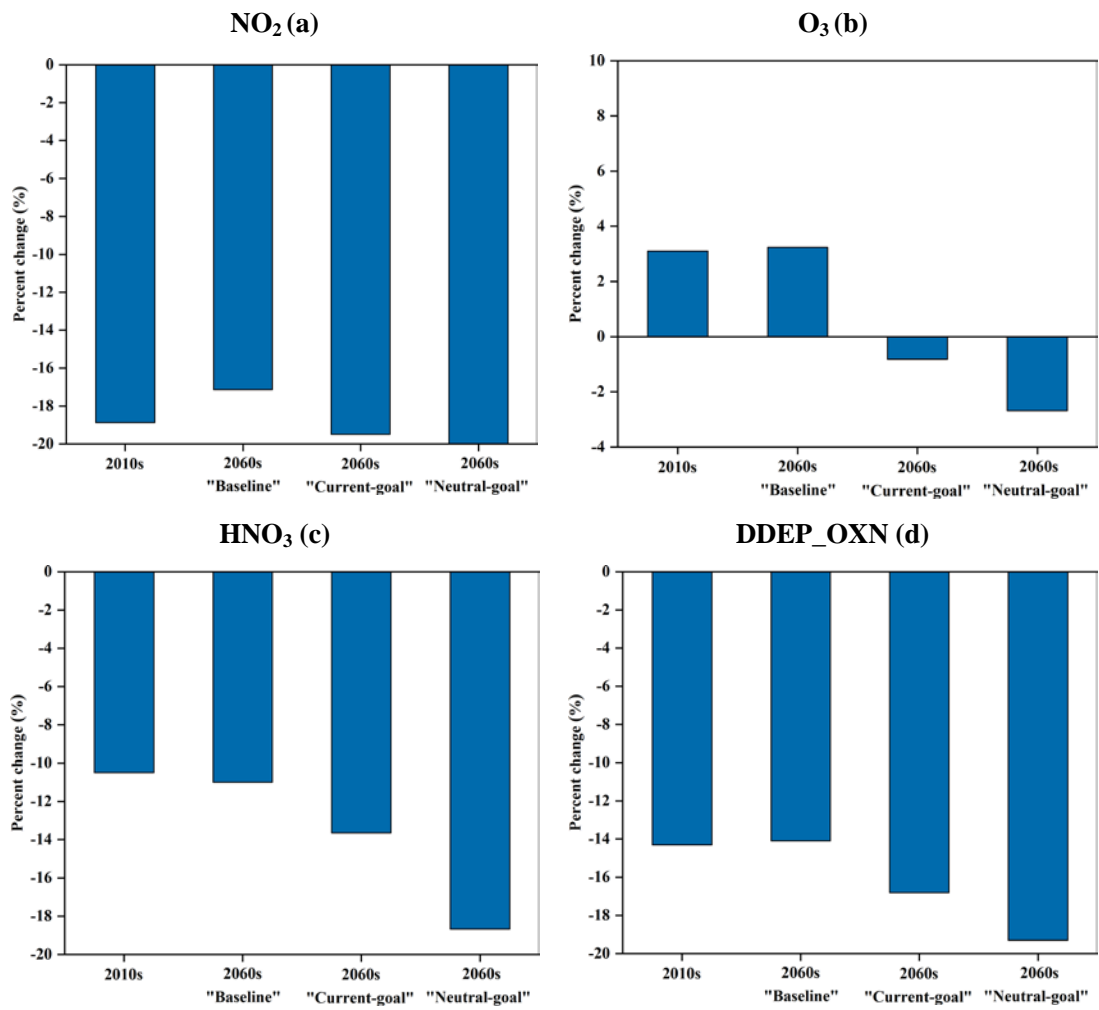

## 101 **Supporting References**

- 102 Chen, F., Miao, S., Tewari, M., Bao, J., and Kusaka, H.: A numerical study of  
103 interactions between surface forcing and sea breeze circulations and their effects  
104 on stagnation in the greater Houston area, *J. Geophys. Res.-Atmos.*, 116, D12105,  
105 <https://doi.org/10.1029/2010JD015533>, 2011.
- 106 Chou, M. D. and Suarez, M. J.: An efficient thermal infrared radiation  
107 parameterization for use in general circulations models, in: Volume 3 technical  
108 report series on global modeling and data assimilation, Greenbelt, MD: NASA  
109 Goddard Space Flight Center, Tech. Mem., 104606, 85 pp., 1994.
- 110 Goodarzi, L., Banihabib, M. E., and Roozbahani, A.: A decision-making model for  
111 flood warning system based on ensemble forecasts, *J. Hydrol.*, 573, 207–219,  
112 <https://doi.org/10.1016/j.jhydrol.2019.03.040>, 2019.
- 113 Hong, S., Noh, Y., and Dudhia, J.: A New Vertical Diffusion Package with an Explicit  
114 Treatment of Entrainment Processes, *Mon. Weather Rev.*, 134, 2318–2341,  
115 <https://doi.org/10.1175/MWR3199.1>, 2006.
- 116 Iacono, M. J., Delamere, J. S., Mlawer, E. J., Shephard, M. W., Clough, S. A., and  
117 Collins, W. D.: Radiative forcing by long - lived greenhouse gases: Calculations  
118 with the AER radiative transfer models, *J. Geophys. Res.-Atmos.*, 113, D13103,  
119 <https://doi.org/10.1029/2008JD009944>, 2008.
- 120 Lin, Y., Farley, R. D., and Orville, H. D.: Bulk parameterization of the snow field in a  
121 cloud model, *J. Appl. Meteorol. Climatol.*, 22, 1065–1092,  
122 [https://doi.org/10.1175/1520-0450\(1983\)022<1065:BPOTSF>2.0.CO;2](https://doi.org/10.1175/1520-0450(1983)022<1065:BPOTSF>2.0.CO;2), 1983.
- 123 Niu, G., Yang, Z., Mitchell, K. E., Chen, F., Ek, M. B., Barlage, M., Kumar, A.,  
124 Manning, K., Niyogi, D., Rosero, Enrique., Tewari, M., and Xia, Y.: The  
125 community Noah land surface model with multiparameterization options  
126 (Noah-MP): 1. Model description and evaluation with local-scale measurements,  
127 *J. Geophys. Res.-Atmos.*, 116, D12109, <https://doi.org/10.1029/2010JD015139>,  
128 2011.
- 129  
130
